# Supplementary material
Source: HighWire-hosted journal article supplement (http://www.jneurosci.org/highwire/filestream/601629/field_highwire_adjunct_files/0/Supplemental_Figures.pdf)
Supplement: Supplemental_Figures.pdf [file Supplemental_Figures.pdf]

# Supplementary Data

## **Parkin Directly Modulates 26S Proteasome Activity**

Ji Won Um<sup>1</sup>, Eunju Im<sup>1</sup>, Hyun Jung Lee<sup>1</sup>, Boram Min<sup>1</sup>, Lang Yoo<sup>1</sup>, Jiho Yoo<sup>1</sup>,  
Hermann Lübbert<sup>2</sup>, Christine Stichel-Gunkel<sup>3</sup>, Hyun-Soo Cho<sup>1</sup>, Jong Bok Yoon<sup>4</sup>,  
Kwang Chul Chung<sup>1</sup>

Department of <sup>1</sup>Biology and <sup>4</sup>Biochemistry, College of Life Science and  
Biotechnology, Yonsei University, Seoul 120-749, Korea; <sup>2</sup>Department of Animal  
Physiology, Ruhr-University Bochum, D-44780 Bochum, Germany; <sup>3</sup>Biofrontera  
Bioscience GmbH, D-51377 Leverkusen, Germany

**A**

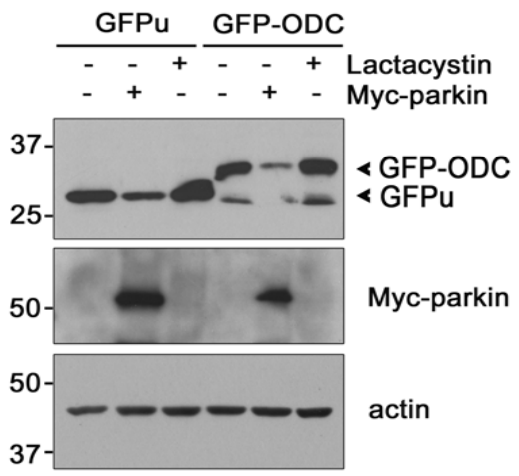

**B**

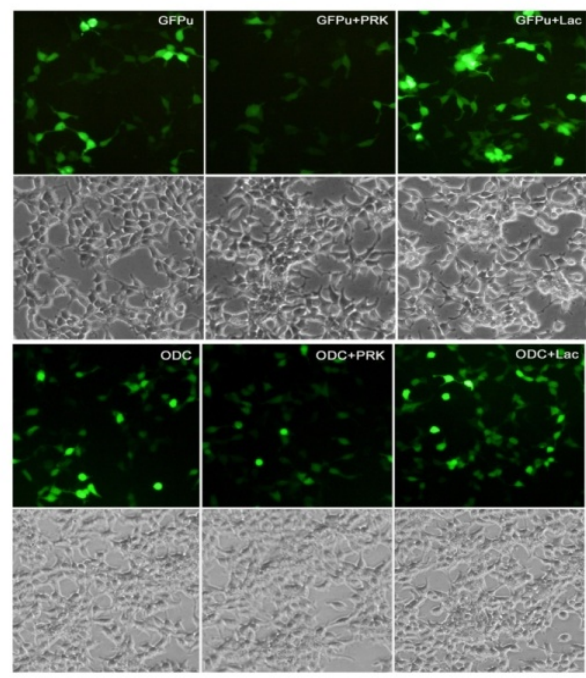

**C**

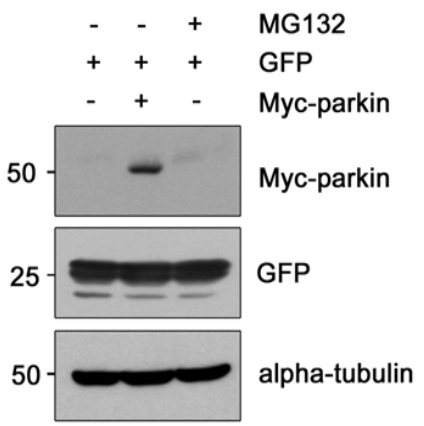

**D**

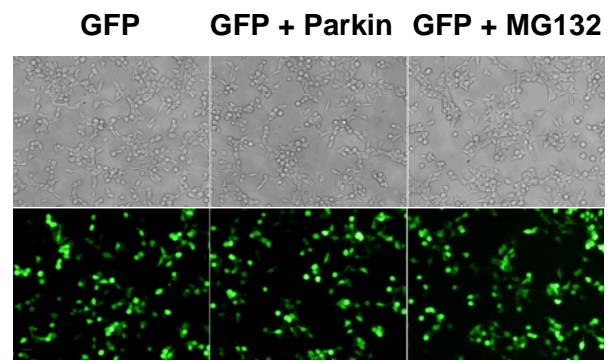

**Fig. S1.** Parkin promotes the degradation of GFPu and GFP-fused ODC. (A) HEK293 cells were transfected with GFPu or GFP-ODC alone or together with Myc-tagged parkin, and then cultured in the presence or absence of 10  $\mu$ M lactacystin. Total cell lysates were immunoblotted with anti-GFP or anti-Myc antibodies. Actin served as a loading control. (B) Fluorescence microscopy of GFPu and GFP-fused ODC expression in transfected cells treated  $\pm$  10  $\mu$ M lactacystin. Phase contrast images show that the number of cells in each group is comparable. (C) HEK293 cells were transfected with Myc-parkin and pEGFP vector and then cultured in the presence or absence of 10  $\mu$ M MG132. Total cell lysates were immunoblotted with anti-GFP or anti-Myc antibodies.  $\alpha$ -Tubulin served as a loading control. (D) Fluorescence microscopy of GFP expression in transfected cells treated  $\pm$  10  $\mu$ M MG132. Phase contrast images (upper row) show that the number of cells in each group is comparable.

**A**

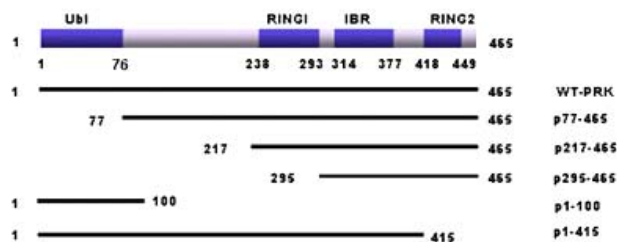

**B**

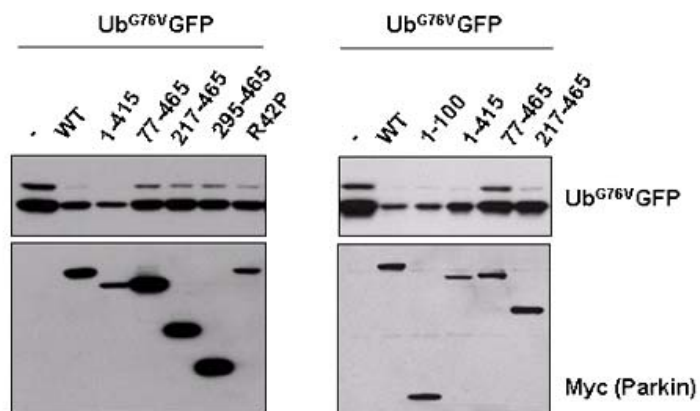

**C**

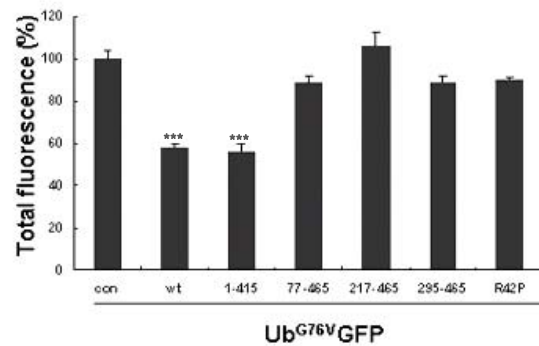

**D**

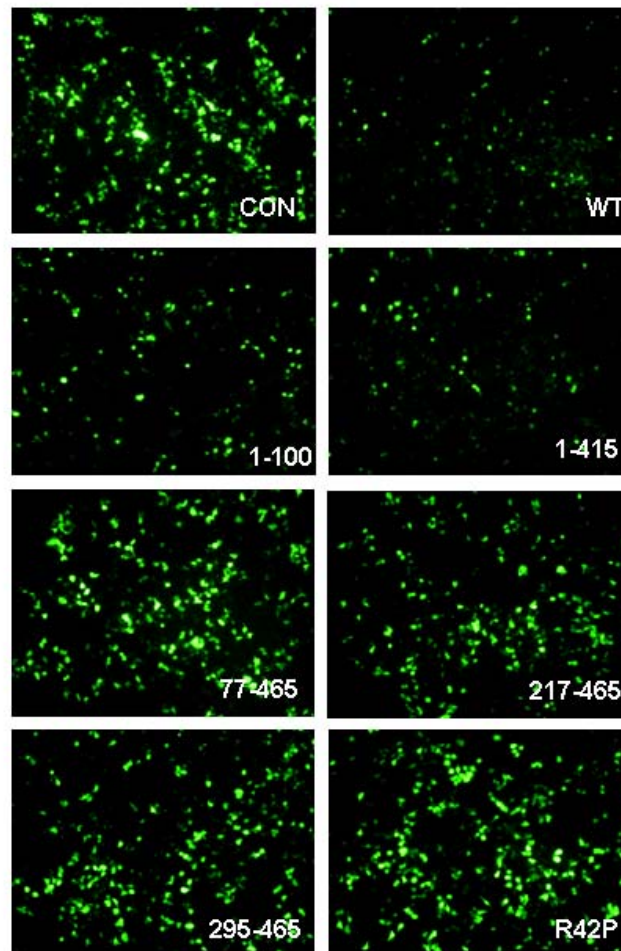

**Fig. S2.** The UBL domain of parkin promotes the degradation of Ub<sup>G76V</sup>GFP. (A) Schematic diagram of functional domains within the parkin protein. (B) HEK293 cells were transfected with Myc-tagged wild type parkin or one of the parkin deletion mutants (parkin<sup>1-100</sup>, parkin<sup>1-415</sup>, parkin<sup>77-465</sup>, parkin<sup>217-465</sup>, and parkin<sup>295-465</sup>) plus Ub<sup>G76V</sup>GFP. Total cell lysates were immunoblotted with anti-GFP or anti-Myc antibodies. Immunoblots are representative of three independent experiments. (C, D) Ub<sup>G76V</sup>GFP degradation was measured at  $\lambda_{\text{EX}} = 480 / \lambda_{\text{EM}} = 510$  using a fluorescence microplate reader (\*\*\*) ( $p < 0.001$ ) (C) or observed by fluorescent microscopy (D).

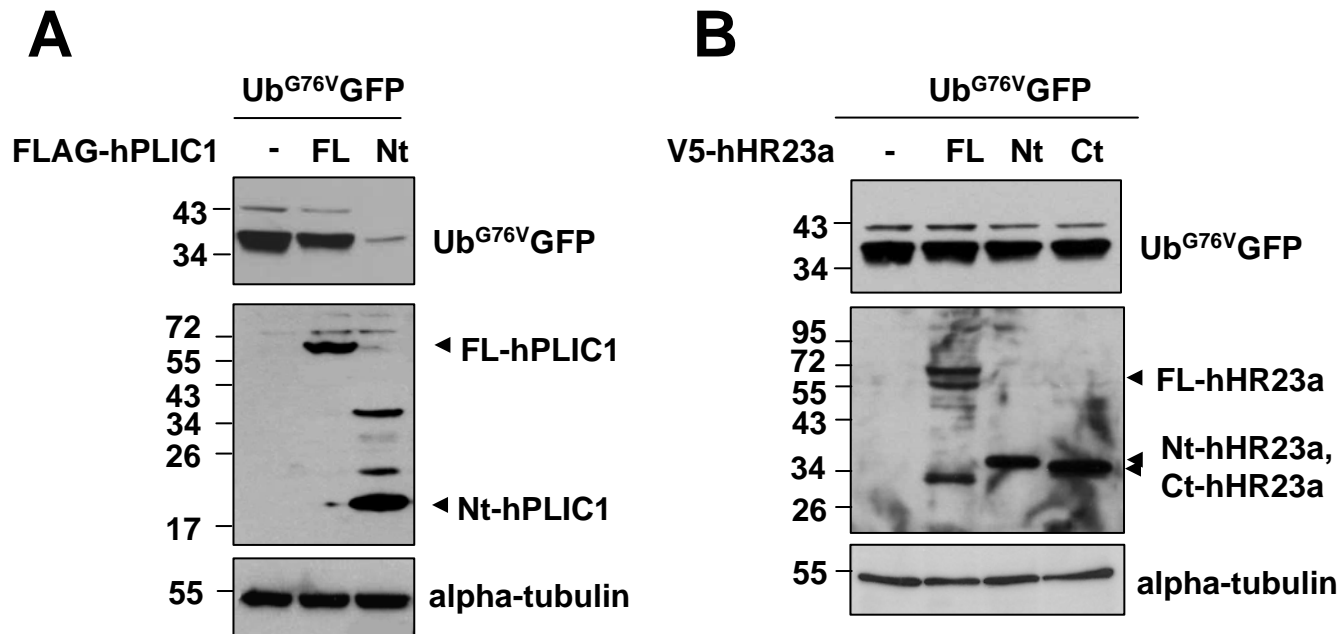

**Fig. S3.** Effect of other UBL domains on 26S proteasomal activity. (A) HEK293 cells were transfected with Ub<sup>G76V</sup>GFP alone or together with either Flag-tagged wild type hPLIC1 (FL) or its C-terminal deletion mutant (Nt) for 24 h. Cell lysates were subjected to immunoblotting with anti-Flag or anti-GFP antibodies.  $\alpha$ -Tubulin served as a loading control. (B) Cells were transfected with Ub<sup>G76V</sup>GFP alone or together with V5-tagged wild type hHR23a (FL), its N-terminal deletion mutant (Ct), or its C-terminal deletion mutant (Nt) for 24 h. Cell lysates were probed with anti-V5 or anti-GFP antibodies.  $\alpha$ -Tubulin served as a loading control.

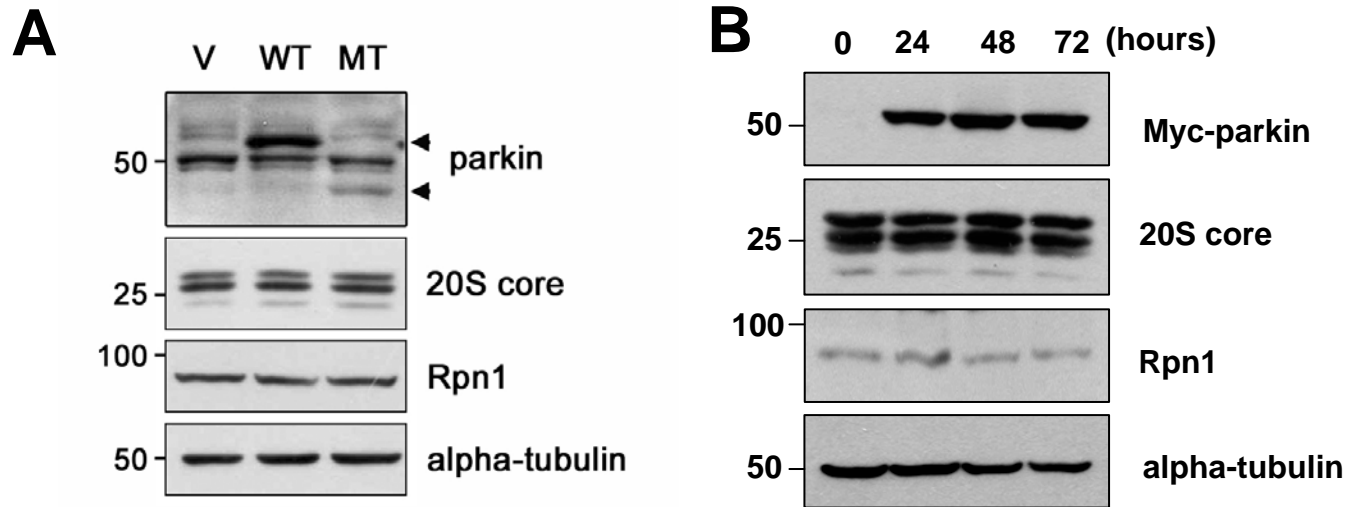

**Fig. S4.** Parkin does not alter the protein levels of 20S or 26S proteasome components. (A) Cell lysates from SH-SY5Y cells stably expressing pcDNA3.1 vector as a control (V), Myc-tagged wild type parkin (WT), or Myc-tagged parkin deletion mutant (amino acids 1-415, MT) were subjected to immunoblotting with antibodies to the 20S proteasome  $\alpha$ -subunit, Rpn1, or parkin.  $\alpha$ -Tubulin served as a loading control. (B) HEK293 cells were transfected with plasmids encoding Myc-tagged parkin for 24, 48, or 72 h. Cell lysates were then subjected to immunoblotting with antibodies to the 20S proteasome  $\alpha$ -subunits, Rpn1, or Myc.  $\alpha$ -Tubulin served as a loading control.

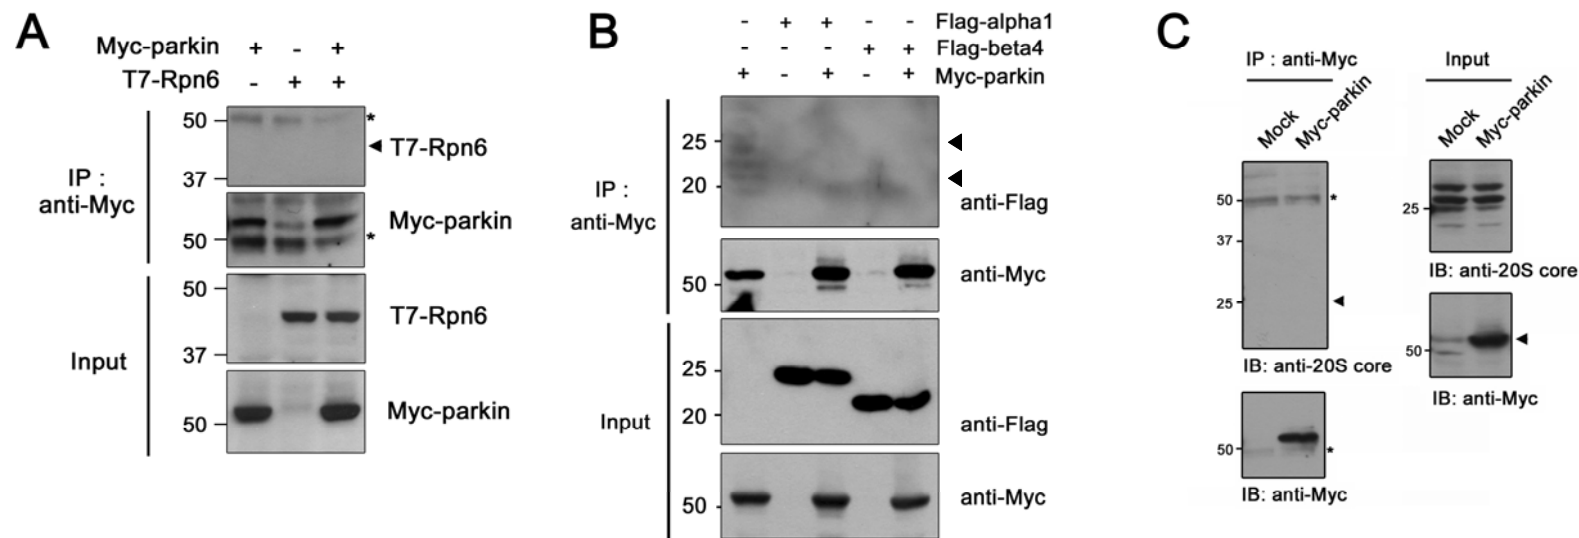

**Fig. S5.** Parkin does not bind to the lid of 19S proteasome and 20S proteasome. (A) HeLa cells were transfected with Myc-parkin alone or together with T7-Rpn6. Whole lysates and anti-Myc immunoprecipitates were then probed with anti-Myc or anti-T7 antibodies. Arrowheads indicate the expected position of T7-Rpn6. Asterisks indicate IgG heavy chains. (B) HeLa cells were transfected with Myc-parkin, Flag-tagged alpha 1 and/or Flag-tagged beta 4. Whole lysates and anti-Myc immunoprecipitates were then probed with anti-Myc or anti-Flag antibodies. Arrowheads indicate the expected position of Flag-tagged alpha 1 or beta 4. (C) HEK293 cells were transfected with Myc-tagged parkin, whole lysates and anti-Myc immunoprecipitates were probed with anti-Myc or anti-20S core antibodies. Arrowheads indicate the position of 20S alpha subunits. An asterisk indicates IgG heavy chains.
